# Supplementary material
Source: PubMed Central journal article supplement (PMC3288185)
Supplement: NIHMS337059-supplement-Supp2.pdf [file NIHMS337059-supplement-Supp2.pdf]

**Supplementary Figure 2. Gating protocol for foreskin T cell subset analysis.**

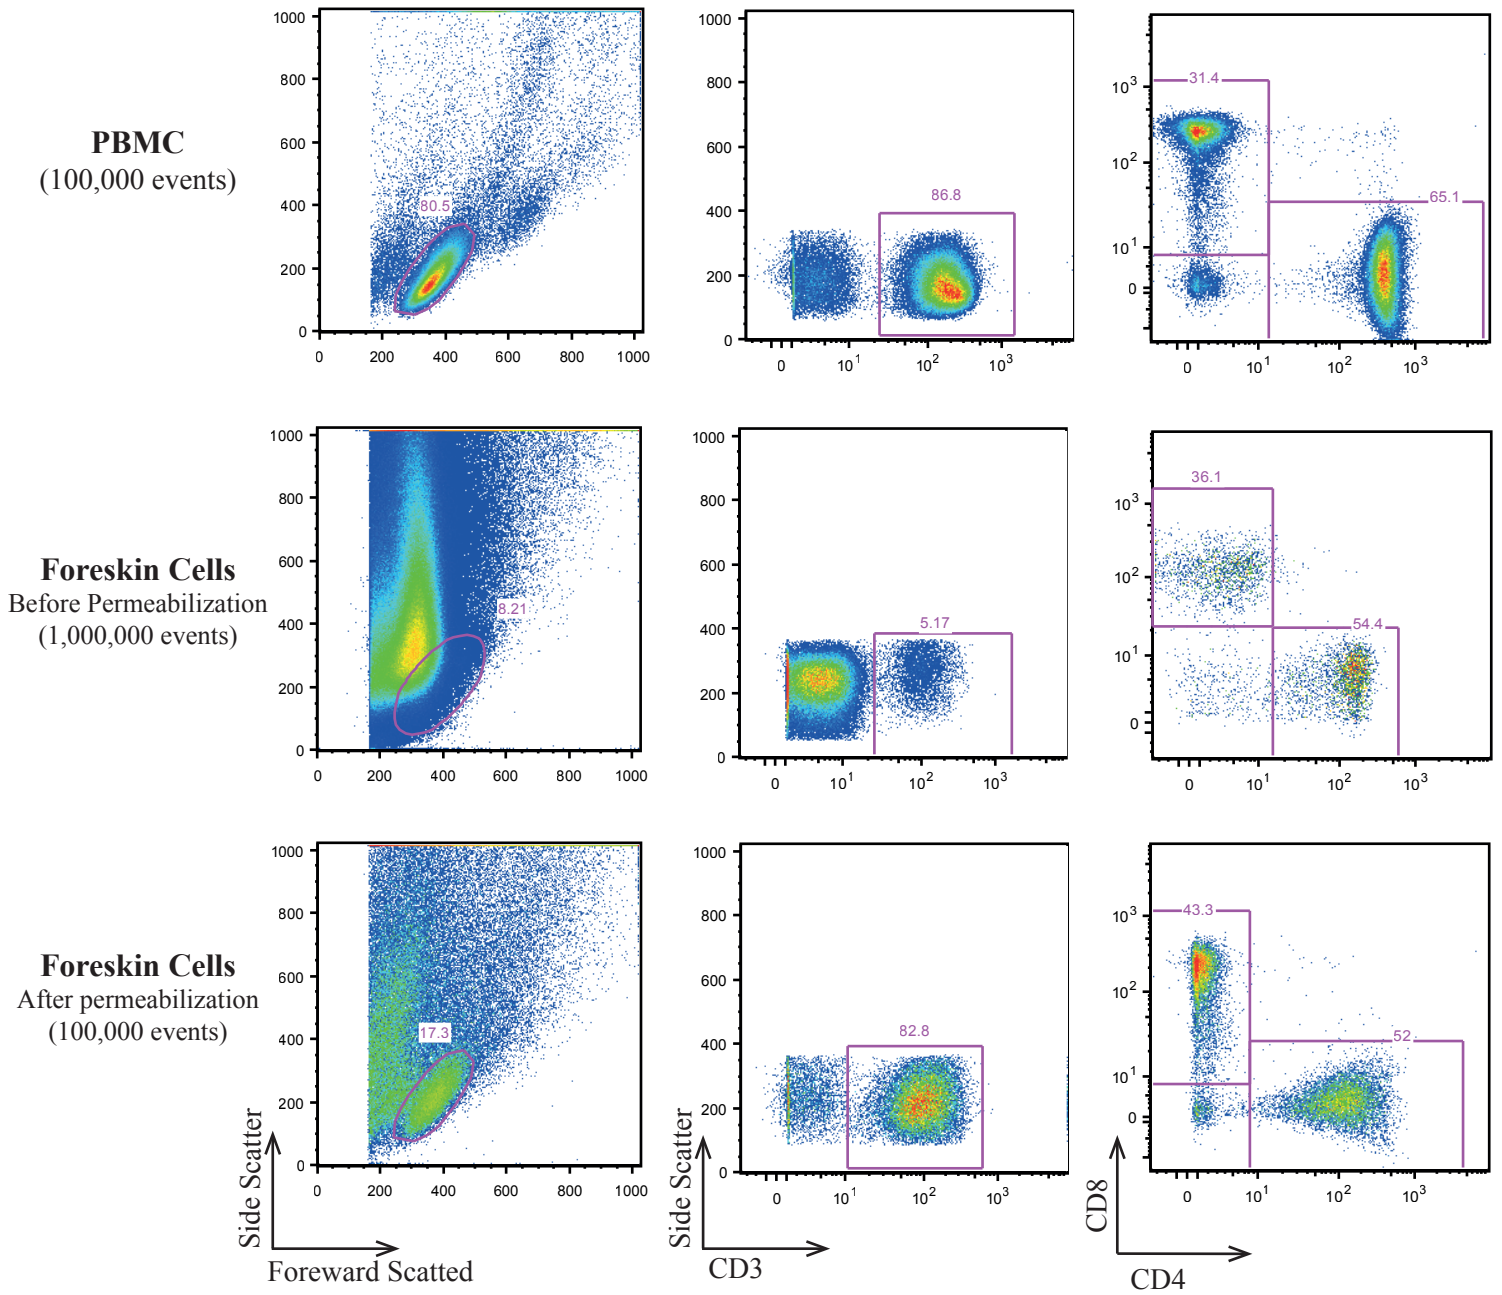

PBMC and foreskin cells were gated based on forward and side scatter, and stained with CD3-APC, CD3-PE and CD8-PerCP (representative plots).
